# Supplementary material for: Long noncoding RNA LUCAT1 enhances the survival and therapeutic effects of mesenchymal stromal cells post-myocardial infarction
Source: PubMed Central journal article supplement — Mol Ther Nucleic Acids. 2021 Dec 11;27:412–26. doi: 10.1016/j.omtn.2021.12.006 (PMC8733180; doi:10.1016/j.omtn.2021.12.006), 2021-12-11
Supplement: mmc1.pdf [file mmc1.pdf]

**Supplemental information**

**Long noncoding RNA LUCAT1 enhances the  
survival and therapeutic effects of mesenchymal  
stromal cells post-myocardial infarction**

**Yue Tao, Qingnian Liu, Rongrong Wu, Changchen Xiao, Cheng Ni, Kan Wang, Wangxing Hu, Zhiwei Zhong, Jing Zhao, Qingju Li, Dan Zhu, Shuhan Zhong, Hong Yu, Wei Zhu, Jinghai Chen, Xinyang Hu, and Jian'an Wang**

# SUPPLEMENTAL INFORMATION

## SUPPLEMENTAL FIGURES AND LEGENDS

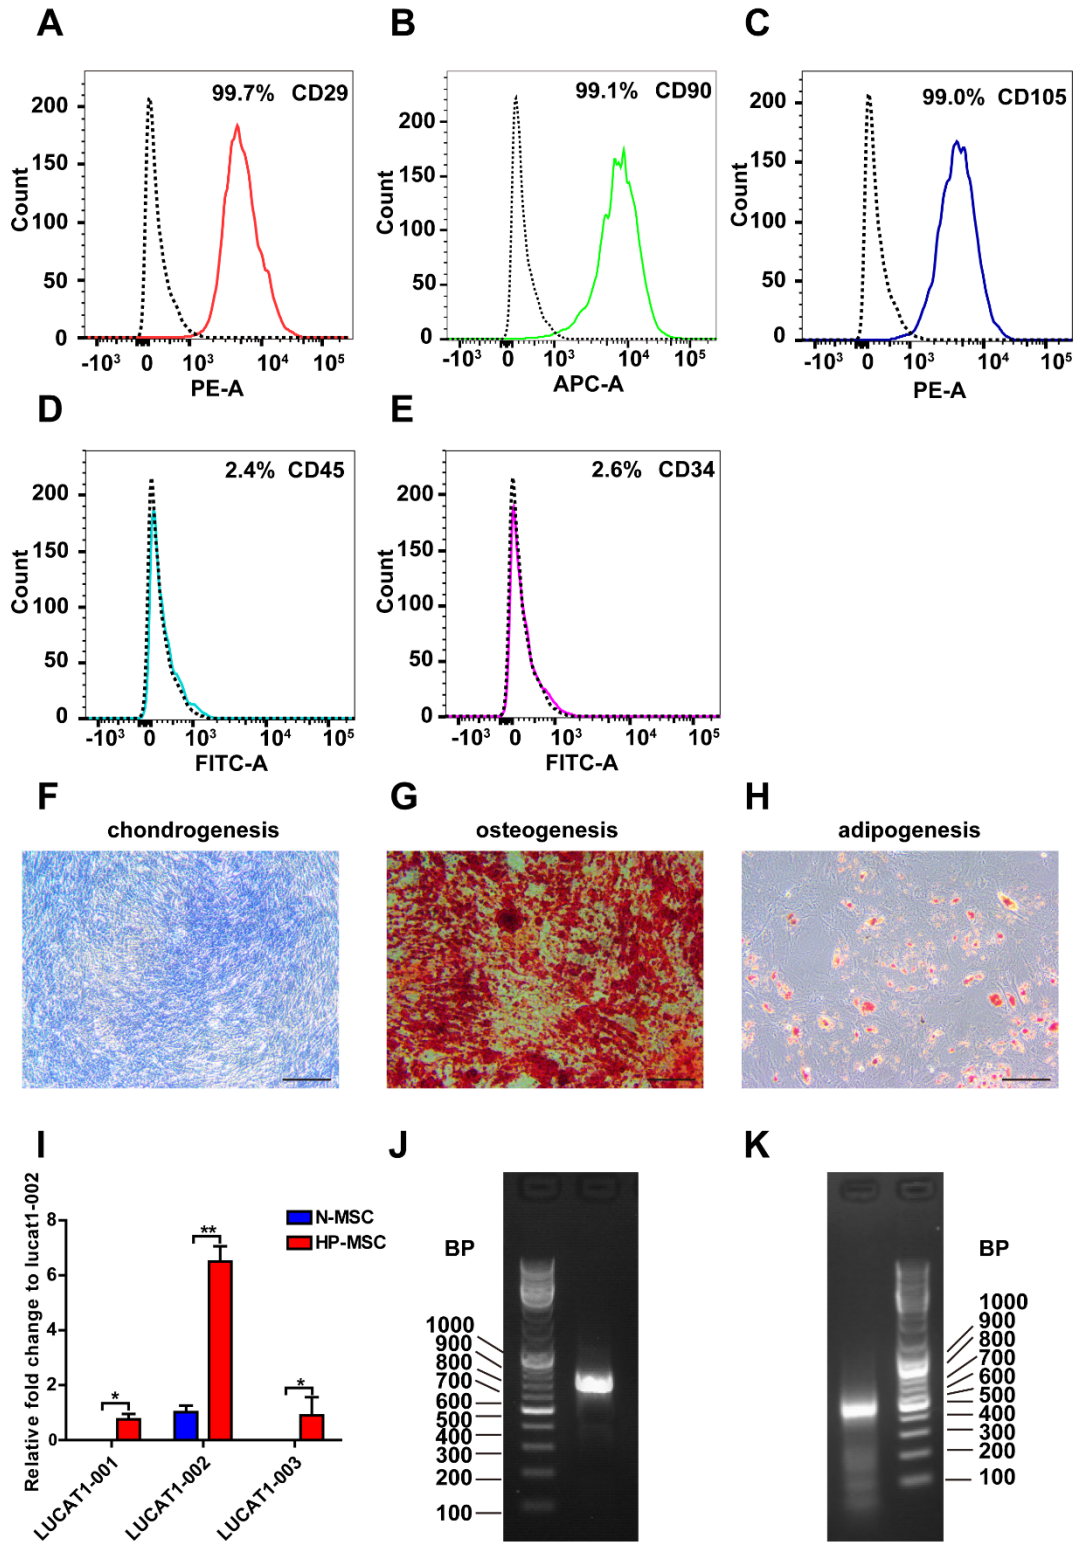

**Supplementary Figure S1. MSCs identification and characterization of LUCAT1 in MSCs**

Characterization of MSCs: positive for mesenchymal cell surface markers PE-CD29 (A), APC-CD90 (B), PE-CD105 (C), and negative for the hematopoietic surface marker FITC-CD45 (D) and endothelial cell surface marker FITC-CD34 (E). The chondrogenesis, osteogenesis and adipogenesis differentiation of MSCs were shown with toluidine eblue staining (F, dark blue), alizarin red staining (G, dark red) and oil red O-staining (H, red), respectively (bar = 100  $\mu$ m). I, LUCAT1-002 was the longest transcripts and expressed higher both in N-MSCs and HP-MSCs compared with other transcripts, validated by qRT-PCR with three pairs of non-overlapping primers to each transcript (n = 3). 5' (J) and 3' (K) rapid amplification of cDNA ends (RACE) assays were showed by gel electrophoresis image of PCR products. Data are presented as mean  $\pm$  SEM. \*  $p < 0.05$ , \*\*  $p < 0.01$ , \*\*\*  $p < 0.001$ .

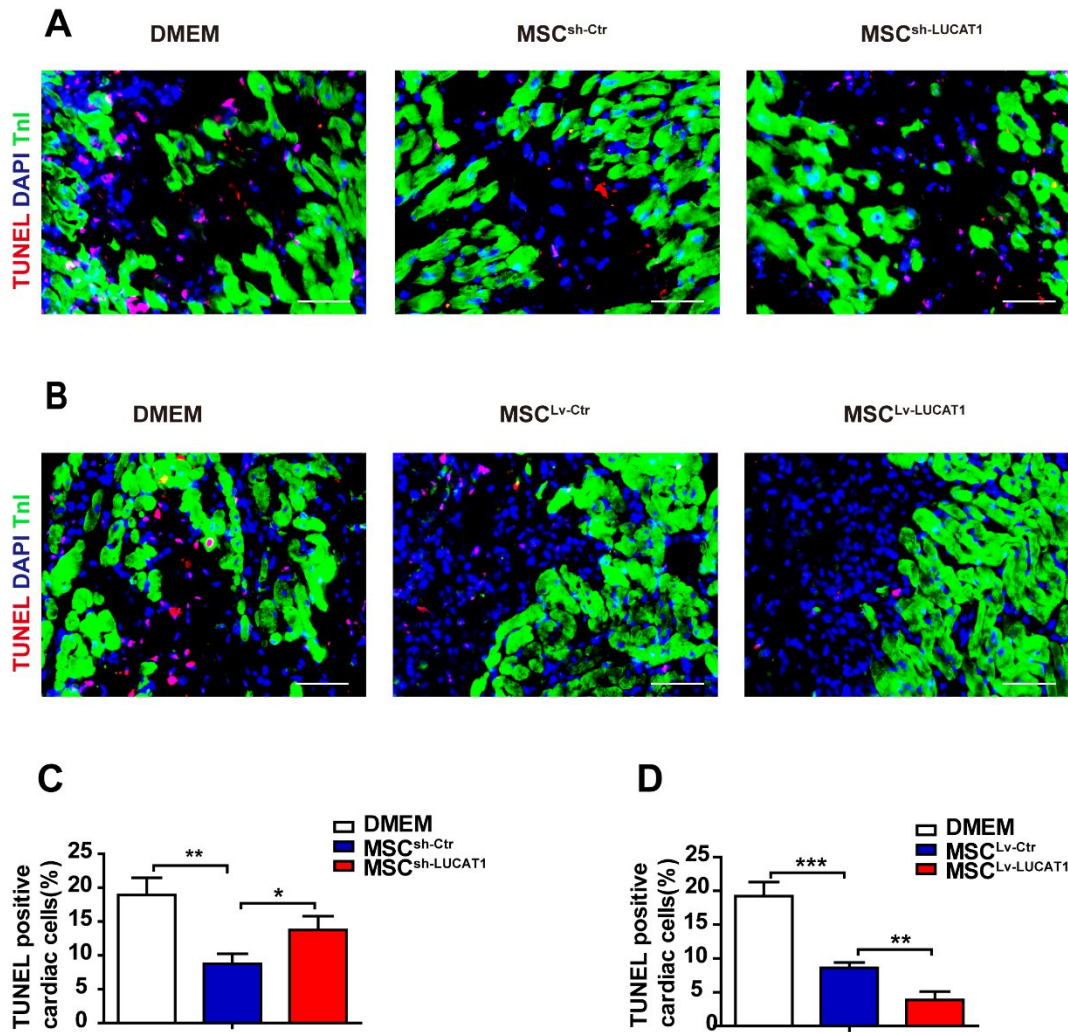

**Supplementary Figure S2. The TUNEL staining of the infarct border area at 3 days post MI**

A and B, TUNEL staining of apoptotic cells in border area. bar=50 $\mu$ m. C and D, Quantitative analysis of TUNEL positive cardiac cells in border zone. n=5 for each group. \* $P < 0.05$ , \*\* $P < 0.01$ , \*\*\* $P < 0.001$ .

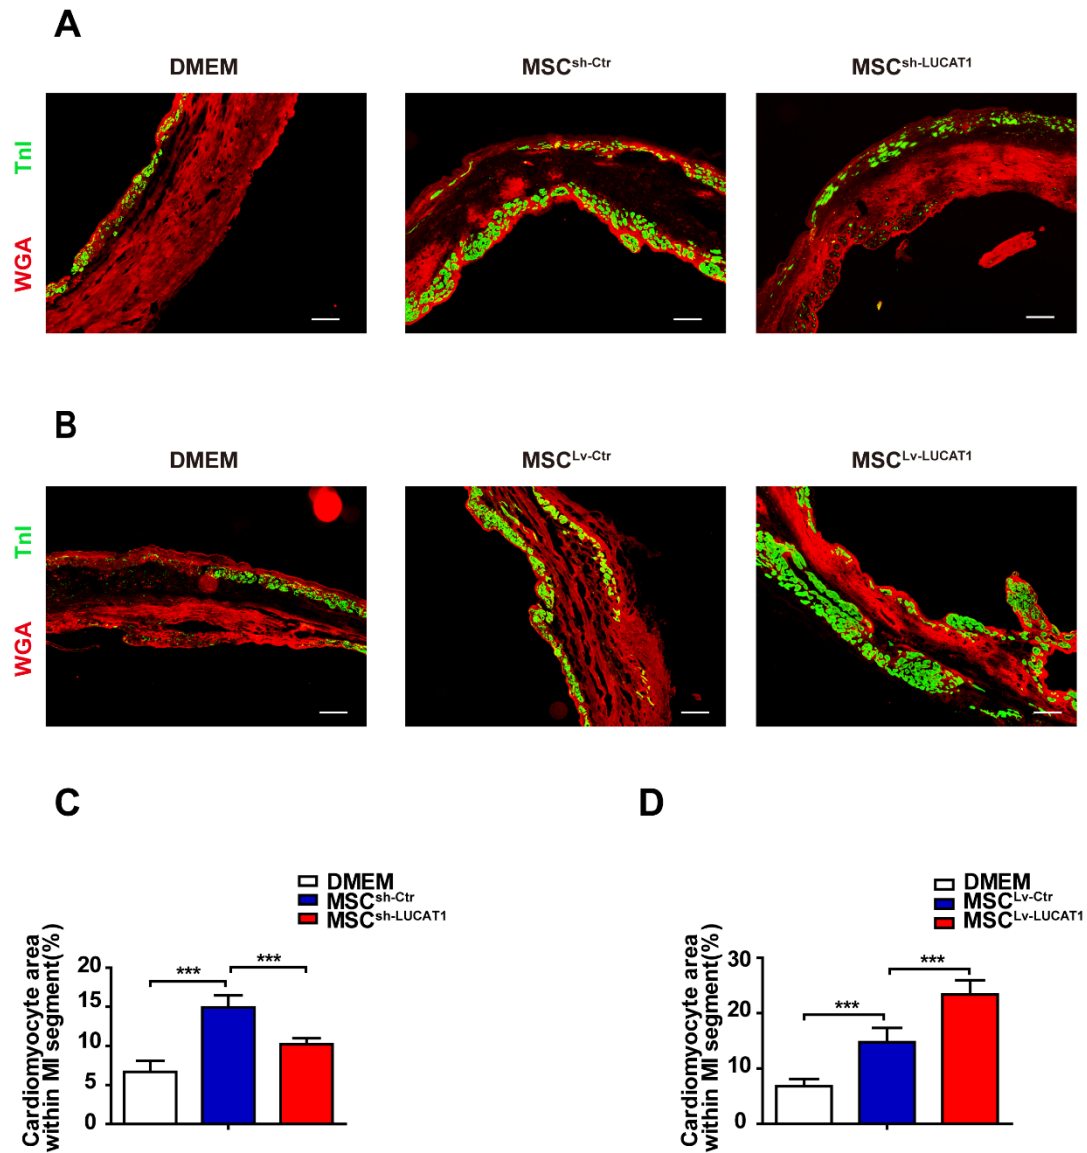

**Supplementary Figure S3. The wheat-germ agglutinin (WGA) staining of MI segments at 28 days post MI treated with LUCAT1 knockdown or overexpression MSCs**

A and B, The infarct area was stained with WGA (red), troponinI (TnI) (green). bar=100um. C and D, Quantitative analysis of TnI positive area within MI segment. n=5 for each group. \*\*\* $P < 0.001$ .

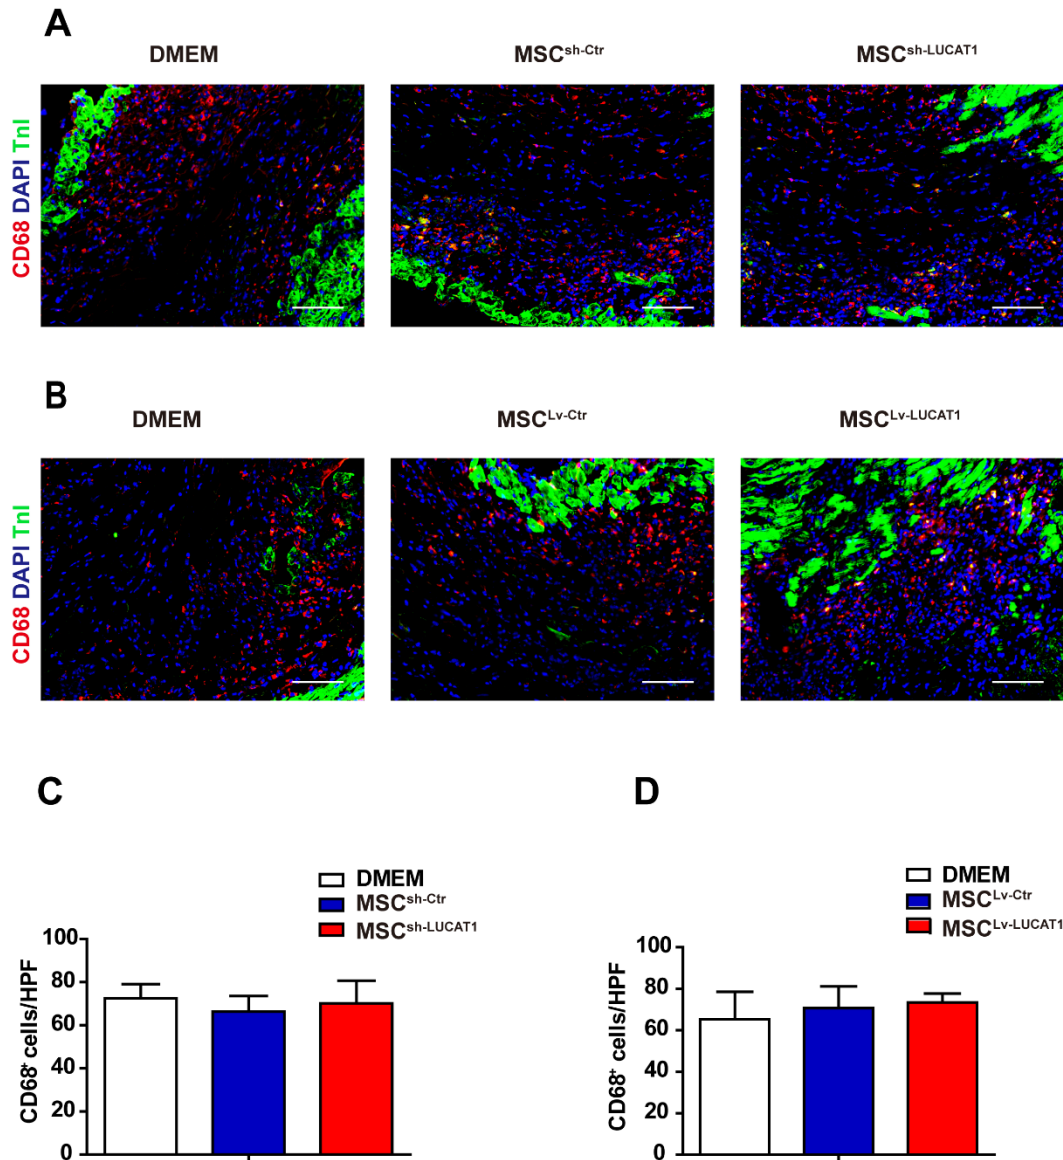

**Supplementary Figure S4. Evaluation of CD68<sup>+</sup> inflammation cell in the border area**

A-B, Immunofluorescent staining of CD68 positive macrophages and troponin positive cardiomyocytes in the border area at 3 days post MI. bar = 100 $\mu$ m. C-D, Quantitative analysis of CD68 positive cells/HPF. n=5 for each group.

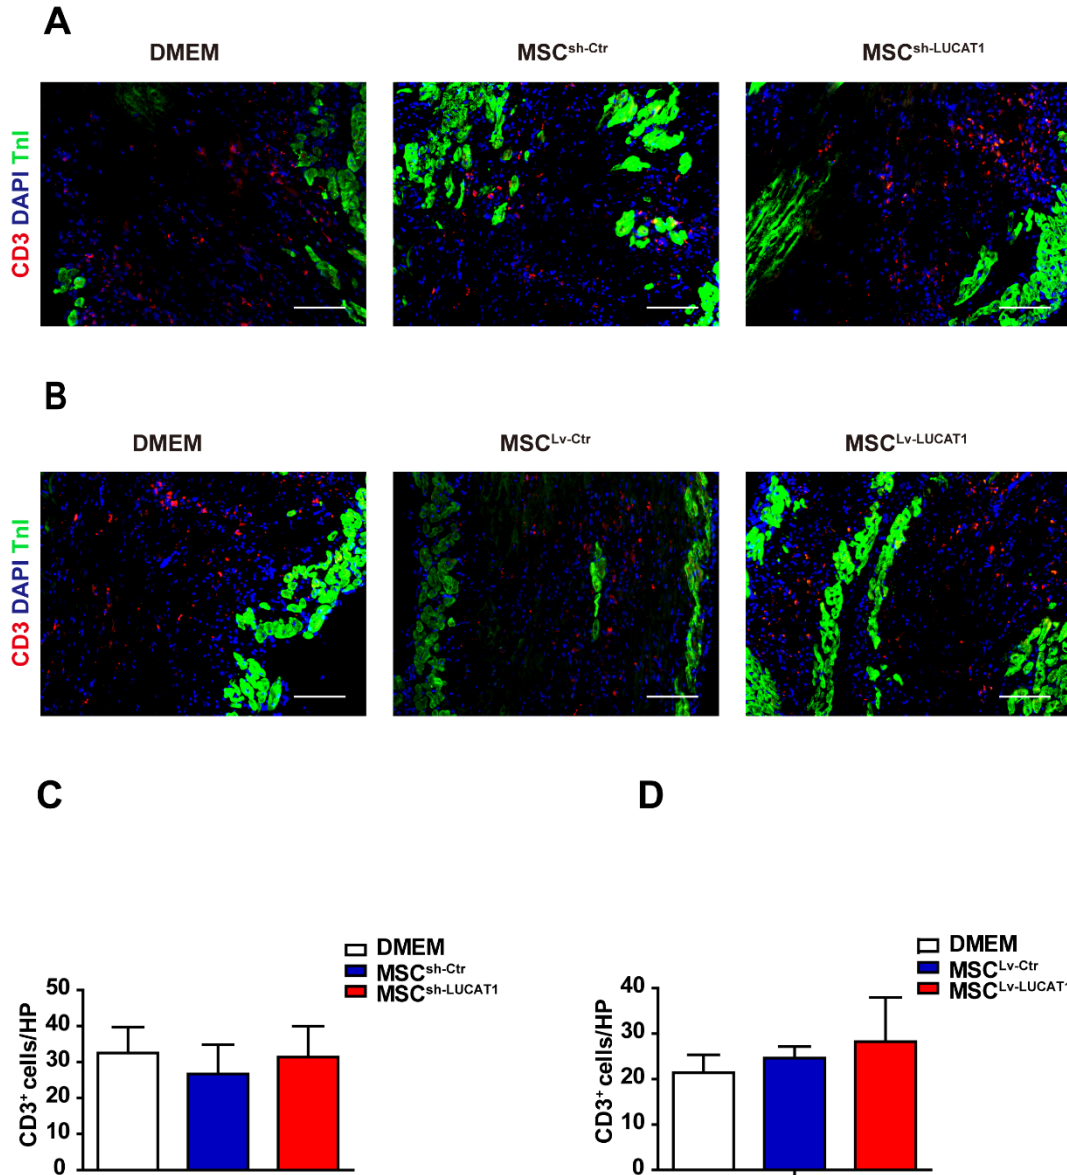

**Supplementary Figure S5. Evaluation of CD3<sup>+</sup> inflammation cell in the border area**

A-B, Immunofluorescent staining of CD3 positive T-lymphocytes and troponin positive cardiomyocytes in the border area at 3 days post MI. bar = 100 $\mu$ m. C-D, Quantitative analysis of CD3 positive cells/HPF. n=5 for each group.

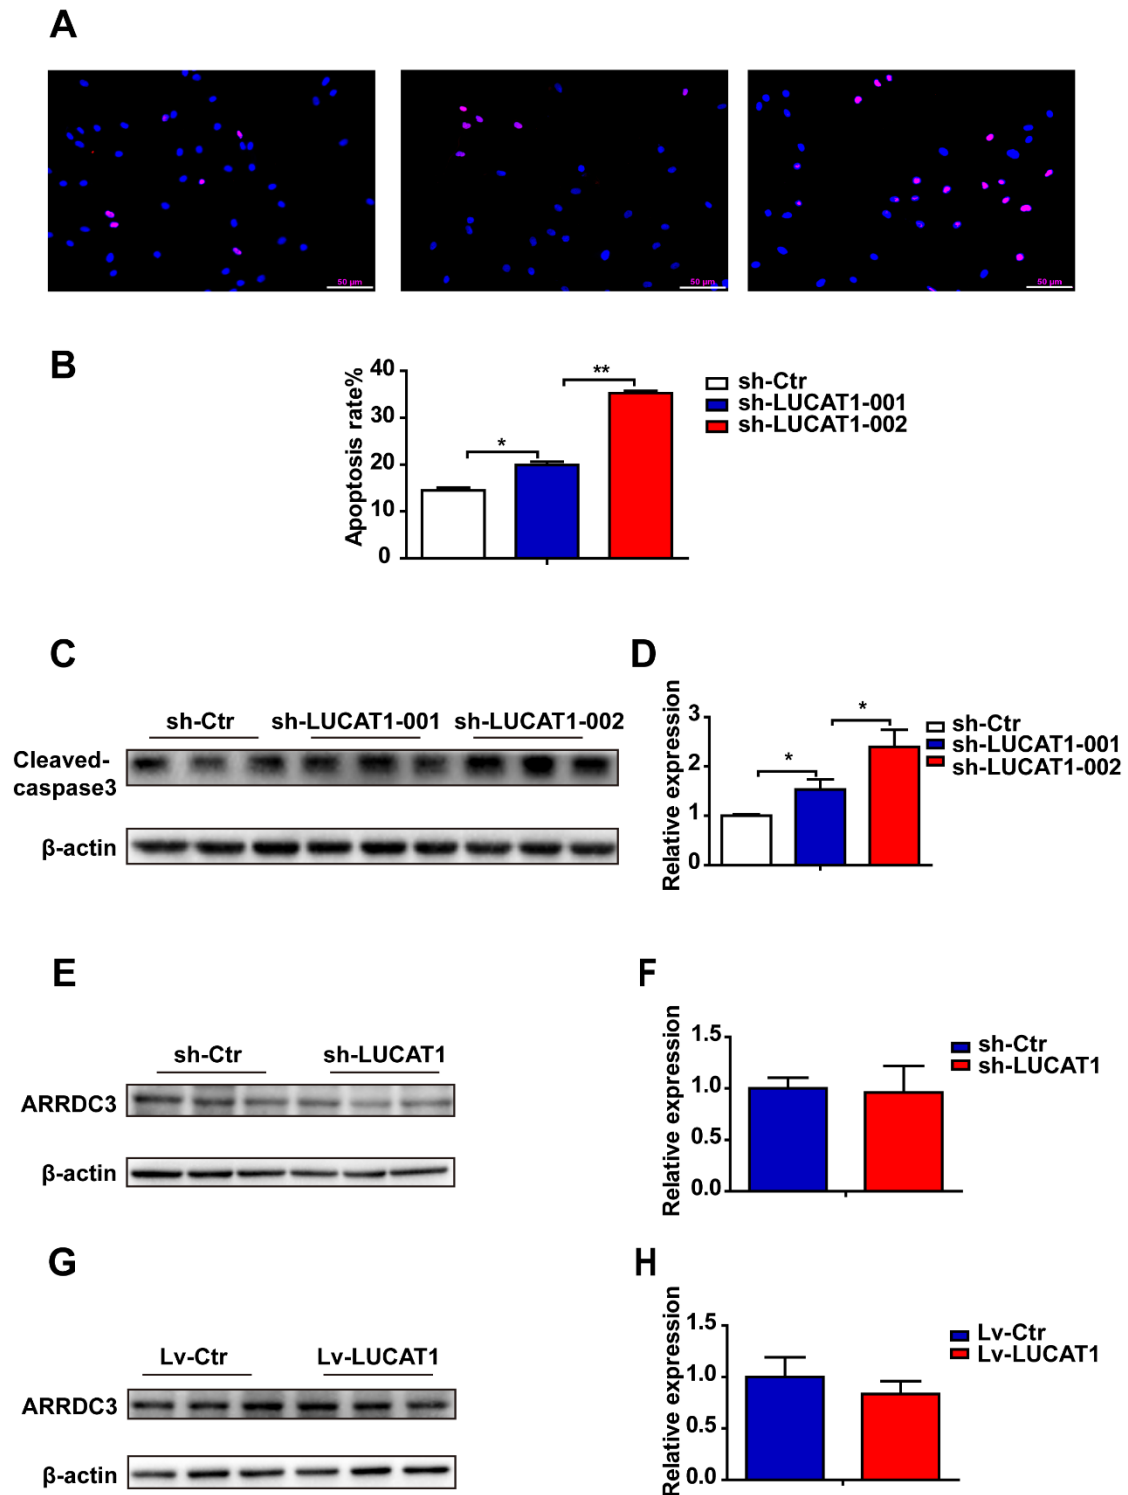

**Supplementary Figure S6. Effects of LUCAT1 on apoptosis and ARRDC3**

A, TUNEL staining with nuclei as identified via DAPI staining (bar = 50  $\mu$ m) of control, sh-LUCAT1-001 and sh-LUCAT1-002 MSCs under 500  $\mu$ M  $H_2O_2$  for 1 h. B, Quantification of TUNEL-positive nuclei (n = 3). C, Cleaved caspase 3 level was



measured by western blot of control, sh-LUCAT1-001 and sh-LUCAT1-002 MSCs under conditions above. D, The quantitative analysis of Cleaved caspase 3 expression (n = 3). E, ARRDC3 level was measured by western blot of control and sh-LUCAT1 MSCs. F, The quantitative analysis of ARRDC3 expression (n = 3). G, ARRDC3 level was measured by western blot of control and Lv-LUCAT1 MSCs. H, The quantitative analysis of ARRDC3 expression (n = 3). The data are presented as mean  $\pm$  SEM. \*  $p < 0.05$ , \*\* $p < 0.01$ .

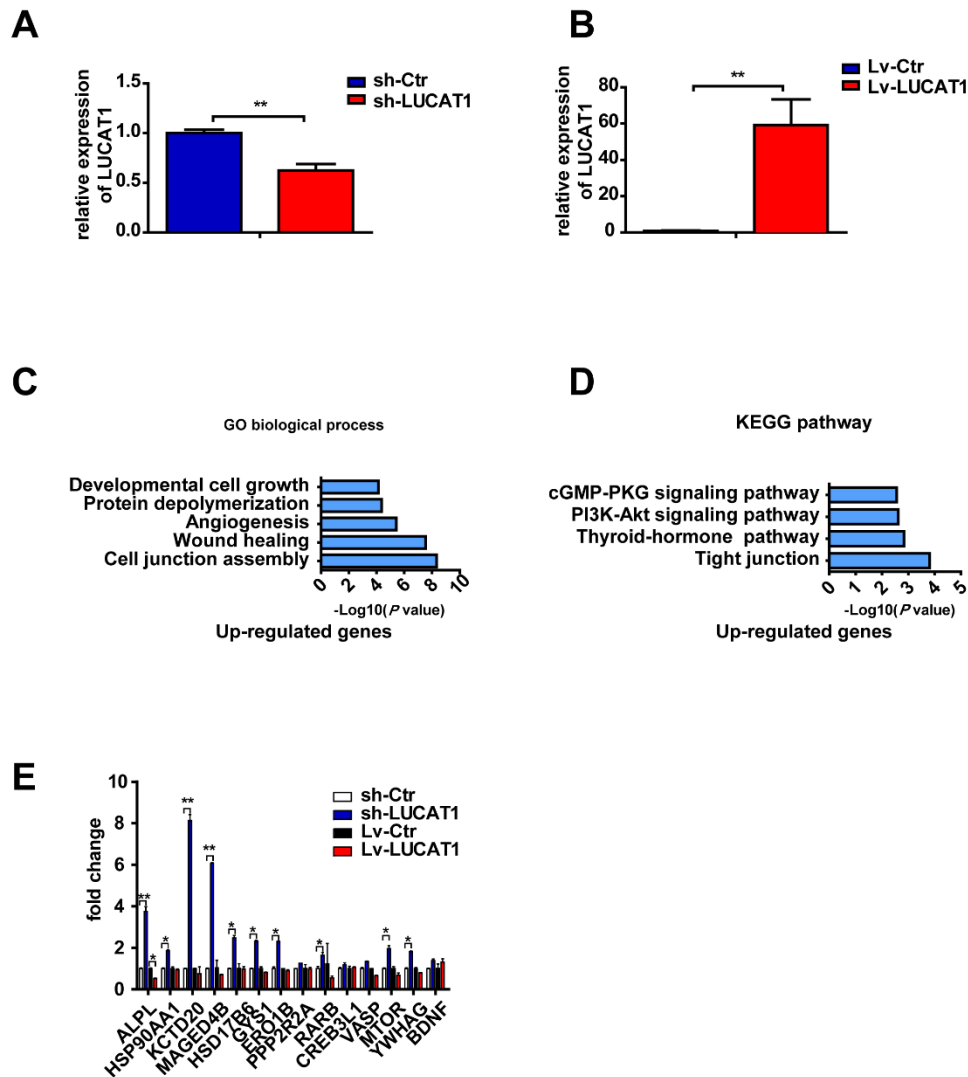

Supplementary Figure S7. RNA sequencing analysis of the PCG expression in the

### **MSCs with LUCAT1 knockdown**

A and B, qRT-PCR showed the knockdown or overexpression efficiency of different lentivirus on LUCAT1 (n = 3). C, The GO analysis of the PCGs with downregulated expression. D, The KEGG analysis of the PCGs with downregulated expression. E, The expression of up-regulated apoptosis-related genes was analyzed through qRT-PCR when LUCAT1 was knockdown or overexpressed. Data are presented as mean  $\pm$  SEM. \*  $p < 0.05$ , \*\*  $p < 0.01$ , \*\*\*  $p < 0.001$ .

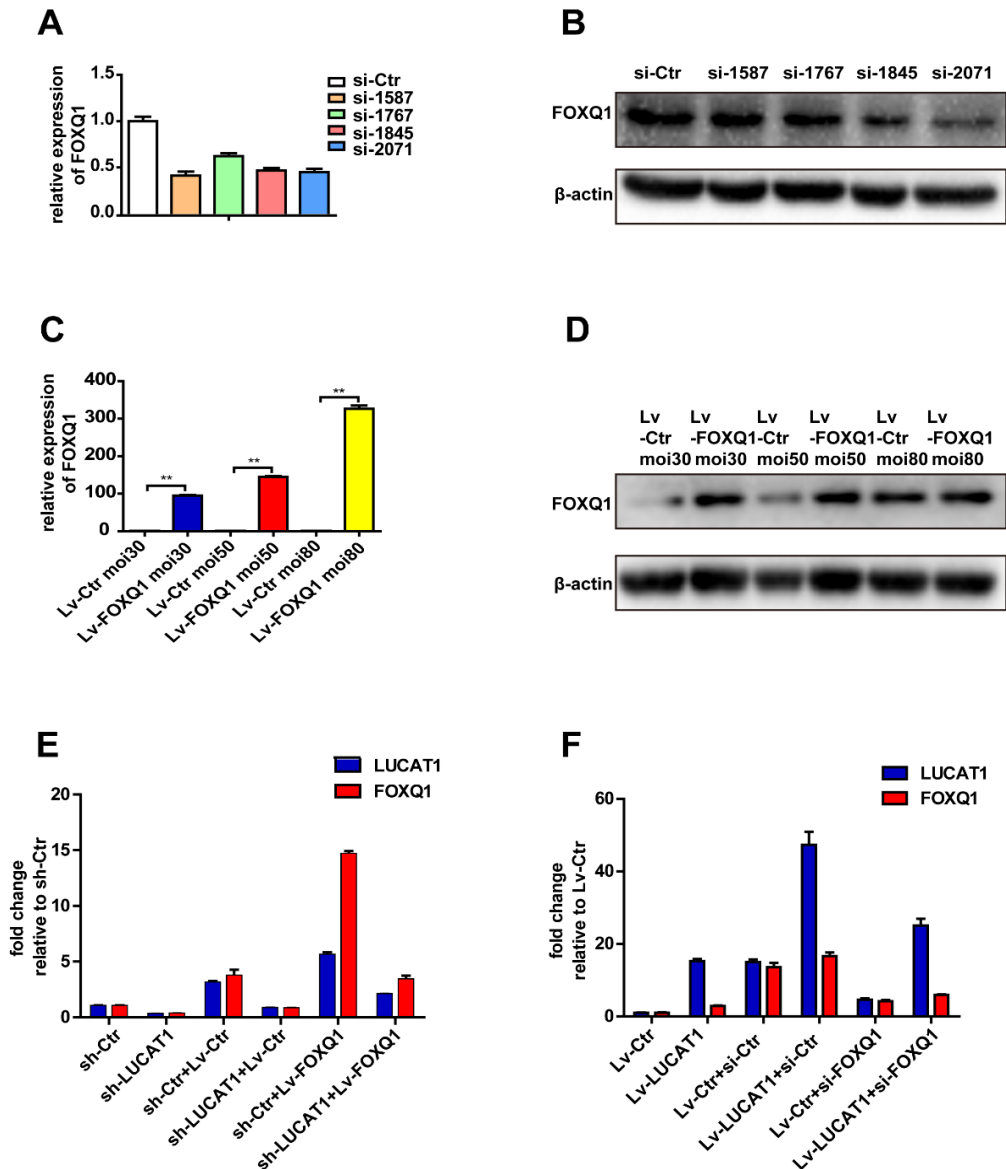

**Supplementary Figure S8. mRNA levels of LUCAT1 and FOXQ1 in rescue experiment**

A and B, qRT-PCR and western blotting showed the knockdown efficiency of different FOXQ1 siRNA in MSCs (n = 3). C and D, qRT-PCR and western blotting revealed the efficiency of FOXQ1 overexpression lentivirus at different multiplicities of infection (MOI) (n = 3). E and F, qRT-PCR detected the expression levels of LUCAT1 and FOXQ1 under different treatments (n = 3). Data are presented as mean

± SEM. \*  $p < 0.05$ , \*\*  $p < 0.01$ , \*\*\*  $p < 0.001$ .

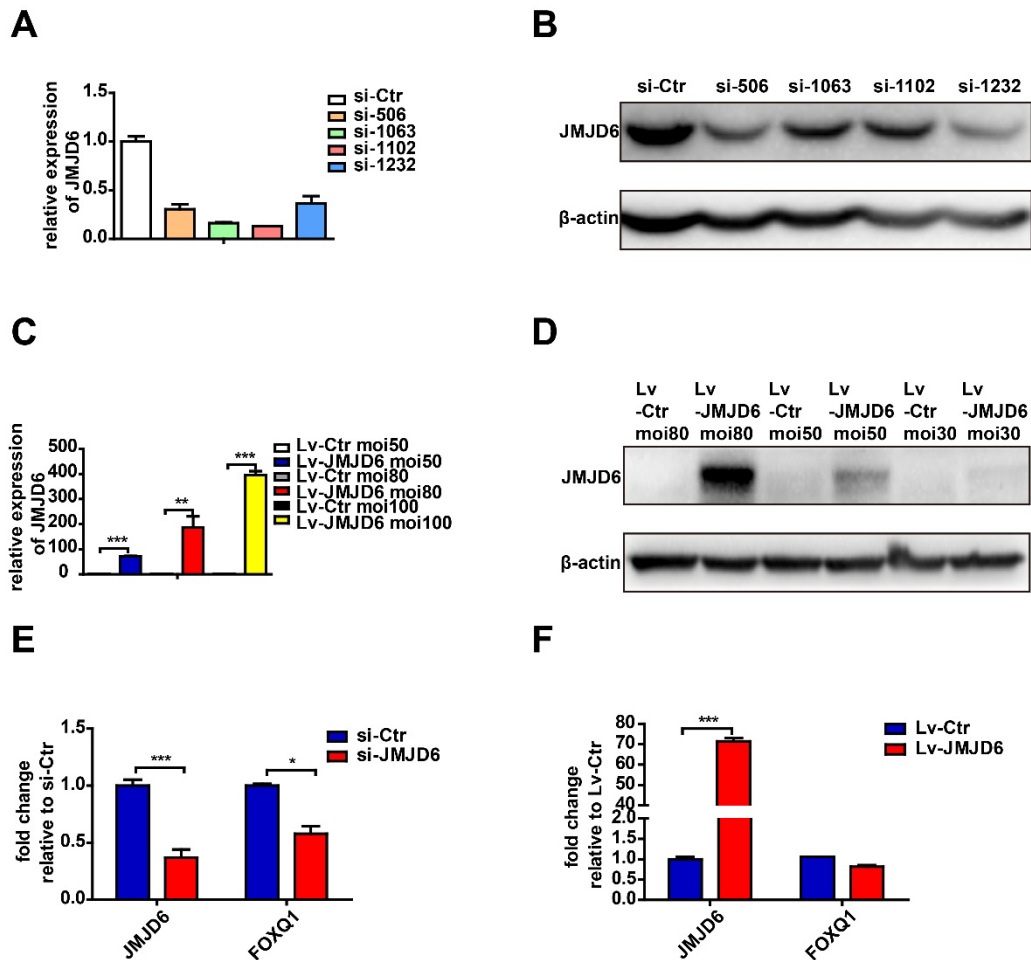

### Supplementary Figure S9. mRNA level of FOXQ1 following JMJD6 knockdown or overexpressed treatment

A and B, qRT-PCR and western blotting showed the knockdown efficiency of JMJD6 siRNA in MSCs (n = 3). C and D, qRT-PCR and western blotting revealed the efficiency of JMJD6 overexpression lentivirus at different MOI levels (n = 3). E and F, qRT-PCR results demonstrated that the mRNA level of FOXQ1 with JMJD6 knockdown or overexpressed treatment (n = 3). Data are presented as mean ± SEM. \*  $p < 0.05$ , \*\*  $p < 0.01$ , \*\*\*  $p < 0.001$ .

**Table S1: SiRNA sequence**

| <b>siRNA</b>    | <b>sense sequence (5'-3')</b> | <b>anti-sense sequence (5'-3')</b> |
|-----------------|-------------------------------|------------------------------------|
| FOXQ1-homo-1587 | CUCCAUCAACGUGCCUUATT          | UAAGGCACGUUUGAUGGAGTT              |
| FOXQ1-homo-1767 | CAGGCUUCGUCUUAUUUCUTT         | AGAAAUAAGACGAAGCCUGTT              |
| FOXQ1-homo-1845 | GGGAACCUUCCACACUAUTT          | AUAGUGUGGAAAGGUUCCCTT              |
| FOXQ1-homo-2071 | CAACGGGCUACAGCUUUAUTT         | AUAAAGCUGUAGCCCGUUGTT              |
| JMJD6-homo-1232 | GGGAGACCAAAGUUAUCAATT         | UUGAUAACUUUGGUCUCCCTT              |
| JMJD6-homo-1063 | CUGGCCACCUGAAUUCAAAATT        | UUUGAAUUCAGGUGGCCAGTT              |
| JMJD6-homo-1137 | GGCAUGUUGUCCUCAUCUTT          | AGAUUGAGGACAACAUGCCTT              |
| JMJD6-homo-506  | CGGUAUGAAAGACCUUACATT         | UGUAAGGUCUUUCAUACCGTT              |

**Table S2: The list of primers****lncRNA qPCR primers**

|               | <b>Forward Primers</b> | <b>Reverse Primers</b> |
|---------------|------------------------|------------------------|
| LUCAT1        | CTGGCTCCTTTCTCACAAG    | AGCTTGCAGTGAACCGAGAT   |
| RP11-841O20.2 | GATGGATTGAGGAGTCTGGCT  | ACATTTTGCTCACTCCTGAACC |
| NEAT1         | CTCTCCATTTCCCATCTGA    | GCTGCTGCCAAACATCTACA   |
| RP11-274H2.3  | TGCCAACTCATCGGAACAGA   | TTCTCAACAGCAGTGGTCCC   |
| MIR210HG      | CTATGCATTCCAGGCTCCAT   | TCGGCTTGGTTATTTCTTGC   |

**mRNA qPCR primers**

|         | <b>Forward Primers</b>     | <b>Reverse Primers</b>    |
|---------|----------------------------|---------------------------|
| ACTB    | CGAAAGTTGCCTTTTATGGCTC     | GCGGCGATATCATCATCCA       |
| GAPDH   | TCTCTGCTCCTCCTGTTCGAC      | ACCAGAGTTAAAAGCAGCCCT     |
| JMJD6   | AAGACCTTACAAGCCCGTGG       | GGGTGTTCCACCATAGCTGCT     |
| FOXQ1   | TCGGAAGACCAGGGTAGAGC       | AGGGACGAACACCTCCAAC       |
| DRP2    | ACGGAATCAGAAGGTTAGAGCTG    | AGGGAGCTGAAGCTTTCCAC      |
| MAPK10  | CCTTTTGTGACAGGGATTCGATAAAC | ACAAACTATGCCCTGAGCCC      |
| RARB    | A TGGAGTTGGGTGGACTTTTCT    | TCAATTGATTGAGCAGTGTGCC    |
| OLR1    | GCAAATTGTTTCAGGACTTCATCCA  | GGTATGTCTGGGAGACAGCG      |
| CDH18   | CACCACAGCTCCATCAAGGT       | TGGAGTGCAGCTTTCCAACA      |
| ART3    | CCTGTCTCAGCTCTCACTGTC      | ACACTTCAGCCTTCACCTGG      |
| NR4A3   | TCTAAAGACGGAACCGCCAC       | AAAAGGTGATGAGGGCCTGG      |
| EPHA1   | TTCGAGACCTTGTGTCTGGC       | CCTGACACTGGGAACACCTC      |
| GADD45G | CAGCCAAAGTCTTGAACGTGG      | TCCTCGTTGGGGTTCGAAAT      |
| POLQ    | TGACCAAACAGGATTGTCACGA     | AGCTGGCGCCTATTTTCACT      |
| ABCC2   | TGCATCTAGGCAAGGTTAACGA     | GTCCAGGAATGAGGAATTCCAAAAA |
| PCLAF   | AGAAAAGTGGTGGCTGCTCG       | TCCTTTTTGCCACTTGGGAGT     |
| CCL7    | CCCTCACCCCTCCAACATGAAA     | TAGCTCTCCAGCCTCTGCTTA     |
| E2F2    | CAACATCCAGTGGGTAGGCA       | GGCAATCACTGTCTGCTCCT      |
| COL10A1 | CAGCACGCAGAATCCATCTGA      | AACTGTGTCTTGGTGTGGGT      |
| GRM1    | CAGTCCACACGGAAGGGAAT       | AAGCCTCTCTCGGAGTTTGC      |
| NR0B1   | GAAGATCCTCACCACCAGGC       | GGCACGTCCGGGTTAAAGA       |
| SKA3    | CGGCGCCGAGATTCAAATA        | TCAAAGTCGCTTTCTCTCCG      |
| HMMR    | TTTCCAATTGGCTAACGCCG       | GGAGATGGTGCACAACCAGA      |
| CENPM   | CAGGGCGGTTTGAAAGATCG       | GGACTTTGCCAAGTGGACCT      |
| MAGED4B | GGATGAGGGTAGCGACGAAG       | TTTCCGGATCCAGCTGCAAT      |
| SERF1B  | GCCCGTGGAATCAACGAGA        | AGACTTCTTCTCATTAGCTGCCT   |
| ALPL    | AACATCAGGGACATTGACGTG      | GTATCTCGGTTTGAAGCTTTCC    |
| KCTD20  | TGACAGTGACAGGTTATTGCG      | AGGCATAGTCAAGTGAGAGGTC    |
| HSD17B6 | GGACTGGTGAACAATGCAGG       | ACACAGTAGCCTCCTACAAAGA    |
| ERO1B   | CCGAGGCGAAGATGATGGAG       | ACAGGGTCAAAGCGGTGTTT      |
| GJD3    | GCTGTTCGTCGTCTACTCCAT      | ACCGCGAAATAGAAGAGCACG     |
| KLHDC3  | CCGCATTGAGTCTTTGACAC       | GTCATGGAAGTGCCGGTTC       |
| BMF     | AACCCAGCGACTCTTTTATG       | GGCAATCTGTACCTCTGCTTG     |
| LIPA    | TTACAACCAGAGTTATCCTCCCA    | CCAAATGAAGTCAAGATGCTCCC   |

**Table S3: Information of antibodies**

|                                                        | <b>company</b>            |           | <b>Western blot</b> | <b>ChIP</b> | <b>RIP</b> | <b>IHC</b> |
|--------------------------------------------------------|---------------------------|-----------|---------------------|-------------|------------|------------|
| Histone H3 [Asym-dimethyl Arg2] Antibody               | Novus biologicals         | NB21-1002 | 1:1000              | 1:50        |            |            |
| Histone H4R3me2s (symmetric) antibody (pAb)            | Active motif              | 61187     | 1:1000              | 1:50        |            |            |
| Anti-JMJD6                                             | Abcam                     | ab65770   | 1:1000              | 1:50        | 1:50       |            |
| Anti-FOXQ1                                             | Abcam                     | ab51340   | 1:1000              |             |            |            |
| Bcl2                                                   | Cell Signaling Technology | 15071     | 1:1000              |             |            |            |
| Bax                                                    | Cell Signaling Technology | 2774      | 1:1000              |             |            |            |
| Cleaved Caspase3 antibody                              | Cell Signaling Technology | 9661      | 1:1000              |             |            |            |
| β-Actin                                                | Cell Signaling Technology | 4970      | 1:3000              |             |            |            |
| Anti-GFP                                               | Abcam                     | ab290     |                     |             |            | 1:200      |
| Anti-TropinI                                           | Abcam                     | ab8295    |                     |             |            | 1:200      |
| Anti-CD3                                               | Abcam                     | ab16669   |                     |             |            | 1:200      |
| Anti-CD68                                              | Abcam                     | ab125212  |                     |             |            | 1:200      |
| Wheat germ agglutinin (WGA)                            | Thermofisher Scientific   | W32464    |                     |             |            | 100ug/ml   |
| Donkey Anti-Mouse IgG H&L (DyLight® 488)               | Abcam                     | ab96875   |                     |             |            | 1:3000     |
| Donkey Anti-Rabbit IgG H&L (DyLight® 550)              | Abcam                     | ab96892   |                     |             |            | 1:3000     |
| Donkey Anti-Goat IgG H&L (DyLight® 488)                | Abcam                     | ab96931   |                     |             |            | 1:3000     |
| Donkey polyclonal Secondary Antibody to Rabbit IgG - F | Abcam                     | ab150073  |                     |             |            | 1:3000     |

ChIP:Chromatin immunoprecipitation; RIP:RNA-binding protein immunoprecipitation; IHC:immunohistochemistry

**Table S4 : The list of proteins predicted to be only pulled down by sense sequence (see the attached Excel table S4 for details).**

**Table S5: The list of RACE and ChIP primers**

**RACE primers**

**adaptor primers:**

|                 |                                                       |
|-----------------|-------------------------------------------------------|
| 5' adaptor      | GCTGTCAACGATACGCTACGTAACGGCATGACAGTGCCCCCCCCCCCCCCCC  |
| 3' adaptor      | GCTGTCAACGATACGCTACGTAACGGCATGACAGTGTTTTTTTTTTTTTTTTT |
| 5.3' outer      | TT GCTGTCAACGATACGCTACGTAAC                           |
| 5.3' inner      | GCTACGTAACGGCATGACAGTG                                |
| <b>5' RACE:</b> |                                                       |
| RC351-R4        | TGTCTAGGACAGCTCCTAGCTCATATTTAGTGTT                    |
| RC351-R3        | GAAAAATGGGATGCTAACATAAGGCCAAC                         |
| RC351-RT4       | TCAGAGCTCAGGCTATACAT                                  |
| RC351-RT3       | CTTCCATACCAATTTGTTCA                                  |
| <b>3' RACE:</b> |                                                       |
| RC351-F3        | CTTTGAATGCAGCCAAACACAAATTTGTAA                        |
| RC351-F4        | CATGTATTTTATGTGTGGCCCAAGACAATT                        |

**ChIP Primers**

| <b>Promoter area(-)</b> | <b>Forward Primer(5'-3')</b> | <b>Reverse Primer(5'-3')</b> |
|-------------------------|------------------------------|------------------------------|
| -147~-488               | CCCAAAAAGCAGCCATTCCC         | ACGCCGAGTTTCCTCCTTTT         |
| -399~-766               | TCCGTCGCTTTTTGTGCAAC         | CACTTGTGTCCCTGCGGAAG         |
| -757~-1156              | GACACAAGTGCAGGCACAG          | GCGGCGTATGTGCTTCTGTA         |
| -1056~-1281             | GCGCATACAATTTCAAGCCCA        | GCAGTGACCTCTTTCGGGAG         |
| -1261~-1643             | TAAACTGCGTCCCCGAACTC         | CCGGCCCAATATAACCCTGC         |
| -1619~-2019             | CCGCCGCAGGGTTATATTGG         | GCTTTTTCTCTGGAGGGGCT         |

RACE: The 5' and 3' rapid amplification of cDNA ends



**Table S6: Full length of LUCAT1 different transcripts**

**Full length of LUCAT1-002**

TTTAAACAGAAGGCTCCAGGAGACATAACAATCAACACTCCACTCAGACAA  
TGCCAGACCTCCAGAAACCATGTGTCAAGCTCGGATTGCCTTAGACAGG  
TGCAATTTAAGAACAGCTTTCATCCTCTTTTCTCTCATATTGTCACACTATG  
TGTTCTGACTTCTGGCTCCTTTCCTCACAAGAAGCTCACCCAGCTGGA  
ACTTATGGGACCTTGGCACCAGAGACCACAAATTCCTCTTTGAAGTTTTCTA  
ACAGCAACAATGGTATTTCTGACTTGGCTTTCTTGTATTTCTCTCACGTAA  
CAAAATTGGTTCAGCATCTACCATGGGCTACATGCTGAGCTACAGAGTTT  
CGCTCTGTCGCCCAGGCTGGAGTGCAGTGGCGCGCGATCTCGGTTCACTG  
CAAGCTCCACCTCCCGGGTTCACGCCATTCTCCTGCCTCAGCCTCCTGAGT  
AGCTGGGACTACAGGCGCCCGCCACCACACCCAGGAATCCA  
ACTTGCTGTGTTGCTATCACATGTGCTATA  
CATGCTGTTGATGAACTGCTAAAGGGGCTG  
AATGTGACTGACGTCTTTGGAAGGATGAGACTTAGCGTGCCTGTACAGTT  
GTGTCCAAATGCTGTCCTCATCTCCCAATGAAAAGGTATTGTAAATAAAG  
AGAAAGATCAGAGGCTTATTTAAACACTAAATATGAGCTAGGAGCTGTC  
CTAGACACTATGTAAAAGTTTTATTTAGTTCTCACTGTAATGTTGGCCTTA  
TGTTAGCATCCCATTTTTTCAGACTGAGGAAATTATGGCTCAGAGAGGTAA  
GAGACTTATTGAAGGTCACACAGCTCCACAACTTTGGTGTAGATTGAAC  
GTGTACATGGGTCTATGTGACTTTGAATCTTGCATTCTTTACATTATTGGA  
ATATTTACAGAAGGAAAATGACATATTAACATGGCAATAAGATTTCTGG  
TTCCAGTCTGGTTACTGGTCTTCCAAGAGTGTTATAGGATGTATAGCCTGA  
GCTCTGAAGCTTTGTTCTGAAGCATGCTATCAATATGAACAAATTGGTATG  
GAAGGAAGCCACAAATTATATACTAAAATCTAGTTCATCAGAGGAAAATA  
TAGTTAAATACATTTACATTCCCAGAACTGTTAATATTGAAGAATAAAAC

ACACAGTGGGAAAGAGACGAAGAGAAAATACGCCTGTTTTTATGACTTGT  
TGATATCTACAGGGTTTTTCCTTAAGCCTCACAACAATTTACAGCATTGCC  
AGCAGCATTTCAGTACATTTCAGAACAGGATAATTTACCCCGCAGCTGAACT  
AGGGCCATGCCTGGGACAGACAGAGAATGGCCTTCCAGCAGACATGCCA  
AGAAGCAAGCCAGGGTCAGTGAGTGAAGAGGAGGGCAGGCCCATTTGAA  
GCAACACAGTTTATGTAAGTGTGATCTAACTGCTTTCAGTGGAAATGGGTC  
AGACTCCAGTTGAGAGAACCAGGGGCCTGAATGACCCCAGCAAATCACT  
GTGGCAATTCTTTCAATCACCTCTGAGAATATGGCCCTGTGACGACATAAT  
GACGTTTGGATTAATTCCAGTCGGCTGTGTTTTCCCCTCCTTTCTTGCCCTC  
CCGTAGTTGATTTGCCAAATTTTTTTTTGTTTGCTTAAATACGCGGAACTAA  
ACAGGATACATTATATGACAGTCTGTGATAAATTTACCACTGGGAATAGG  
GAAAAGTATGGGATAAAGAAATAGGTATTTTTCGCCTCTCACAGCTGTG  
ATTCAGTTCTGACTCAAAGGAAGTGTGCCACCTACTGAATCACAGAAAC  
CACTTCCTGTGGCTGTTTGGTTTATTCTGGAGGAGCATCAGGCCAAGTGCT  
GCCCTGCCCTGACCCTGACTGGCTCTTCAGAGCCAAGGCATTCACAGCTTG  
AGGTGGTTTTGGCCTCAGACTCTTGAGAACATTGCATATTAAATTACAAGTG  
TTTCGTTTCCTAGCAAGGAGTCTTTAGCAACATGAAAACGAACGTGTGTTA  
TTTGCAAACCAAGTATATCATTACTGAACCTGAATATCCTTACTTTTTTCAT  
AAGGTACGTATTCCGGATGACCACTCTTAAGATCTGAATGTACTGGTTC  
TGTTTTTCCTGAGGGGAACTTGGGCAGTCTGCAGGGTGGCATTACCAGCT  
GAGGGACTTCAAGAGCACCCTTAATCAGTGTGGCAGCACTCAACTTGTA  
TTCCTCACTCAGAGTATTTTTGAGCATGTAATTATTGCCATGTGCTGTGCT  
AGGTAGGGGTAGAGGGTACAGTGGTGAACAAGACCCACAGCTCCTGAC  
CTCATGGCTCATGTGTTCTACACCATAAGGGAATCAAGCTGTGTCTCCCGG  
GGCAGGGGCCTTCCTCTGTTACCATGCAGCCCCAGCATCTAGCACCTGG

CGTTGCATAAAGGAGGCTCTAAATCAAGCTTGTCCAACCCAAGGCCACG  
GGCCACATGTGGCCAGGATGGCTTTGAATGCAGCCAAACACAAATTTGT  
AACTTTCTTAAAACATTATAAGATTTGTGTGTATGTGTTTTAGTCCATCA  
GCTATTGTTAGTGTTTCATGTATTTTATGTGTGGCCCAAGACAATTCTTCTAT  
GTGGCCCAAGGAAACCAAAGATTGAACACTCCTGCTCTAAATACTTGTTT  
GTTGAATAGATACATGAAAAGAAAGAAGGAGAGAAGGAAGAAAGGAGG  
GCGGAAGGAAAGGAAGAAGGGAGAGAAGAAGAGAAGAAAGAAGCAGAG  
AAAGGAAGAGAAAAGAAATTACGGCCAGTGCGGTGGCTCACGCCTGTAA  
TCCTAGCACTTTGGGAGGCCTAAGCGGGCTGATCACCTGAGGTCAGGAGT  
TCGTAAGCCAGCCTGGCCAACATGGTGAAACCCTATCTCTACTAAAAATA  
CAAAAATCAGCAGGGCATGGTGGTGCGTGCCTGTAATCCCAGCTACCTGG  
GAGGCTGAGGTAGGAGAATCGCTGGAACCCGAGAGGCGGAGGCTGCAGT  
GAGTTGAGATCATGTCACTGCACTCCAGGCTGGGCAACAGAGTGAGACTC  
TGTCTCAGAAAAAAAAAAAAAAAAA

**Full length of LUCAT1-001**

GAATCAACACTCCACTCAGACAATGCCAGACCTCCAGAAACCATGTGTC  
AAGCTCGGATTGCCTTAGACAGGTGCAATTTAAGAACAGCTTTCATCCTCT  
TTTCTCTCATATTGTCACACTATGTGTTCTGACTTCTGGCTCCTTTCCTCAC  
AAGAAGCTCACCCAGCTGGAACCTTATGGGACCTTGGCACCAGAGACCA  
CAAATTCCTCTTTGAAGTTTTCTAACAGCAACAATGGTATTTCTGACTTGG  
CTTTCTTGATTTCTCTCACGTTAACAAAATTGGTTCAGCATCTACCATGG  
GCTACATGCTGAGCTACAGAGTTTCGCTCTGTGCGCCAGGCTGGAGTGCA  
GTGGCGCGGATCTCGGTTCACTGCAAGCTCCACCTCCCGGGTTCACGCC

ATTCTCCTGCCTCAGCCTCCTGAGTAGCTGGGACTACAGGCGCCCGCCACC  
ACACCCAGGAATCCAACCTTGCTGTTTGCTATCACATGTGCTATACATGCTG  
TTGATGAAACTGCTAAAGGGGCTGAATGTGACTGACGTCTTTGGAAGGAT  
GAGACTTAGCGTGCCTGTACAGTTGTGTCCAAATGCTGTCCTCATCTCCCA  
ATGAAAAGGAACAAAACCCATCAGAAGATGTCAGAAGATAAGGATTTTT  
GTCCTGATGCTACACTTACCAGCTGTCCCTCAGTGTTCTACTTCTTAAAAA  
AAGAGAGATGGATAAACAGAGGCAACCCGAGGATAAAGGCCTTGCTCAG  
TGTCACACATTTTCAGTCACTAAATAAGACACAATGGATGCCAGTATTCTC  
ATCCCCTCACAAATAAAGAGCCTTCAAGCTCTTGCAGTCAACAAGAACTT  
TTGGAATGATTTCACTGCCTGAAAAGGCAGATACATAGGTGACACCCACA  
AATAGGAAGAAAATCAACCTGAACCTGAGTGTGTGGGCTCACTGACTCTA  
AGCAGTAGAGACAGAAGAAAAATAAAGTTTTAGCAAAGAAGGGTTCTGA  
AAGAAAATAAATATAGCTCGTTATCAAGTGCTGTTTTTACACAGTAAAAC  
ATGGGCAA AATTACTCTTCTTTAAGTAGTAATTCTTATCTCTTGATTAAGT  
CACCTACTCATTCAATTAATAAATACATACTGATTGTTTTCTAAAAAAAAA  
AAAAAAAAA
